# Supplementary material for: Genome-wide identification of microRNAs associated with the somatic embryogenesis in Eucalyptus
Source: Research Square preprint supplement (doi:10.21203/rs.3.rs-47575/v2), 2020-10-13
Supplement: Supplementary file 1 [file 11aff3459f55b79511651601.xlsx]

## Sheet: Sheet1
Additional file 5. primer sequences used for the tailed miRNA qRT-PCR.
miRNA	Primer sequence (5' -> 3')	Bases
Actin (control)	TGCGTGTCGTGGAGTCG	17
egd-miR156a-3p	CGGTGCTCACTTCTCTTCTGTCAGT	25
egd-miR390a-3p	CGCGCTATCCATCCTGAGTTTCA	23
egd-miR396d-3p	CCGTTCAAGCTAGCTGTGGGAAG	23
egd-miR482b-3p	TCTTCCCTGTTCCGCCCATTC	21
egd-N-miR1-5p	AGGCTCAGGACAATGCCCATT	21
egd-N-miR18-5p	CGGTTCTCAGCTTTGGCCTCTTTTT	25
egd-N-miR6-3p	CGCGCATTATCAGCCTTCTCATCTTG	26
